# Supplementary material for: VPS35 D620N knockin mice recapitulate cardinal features of Parkinson’s disease
Source: PubMed Central journal article supplement (PMC8135078; doi:10.1111/acel.13347), 2021-03-21
Supplement: ACEL-20-e13347-s001.pdf [file ACEL-20-e13347-s001.pdf]

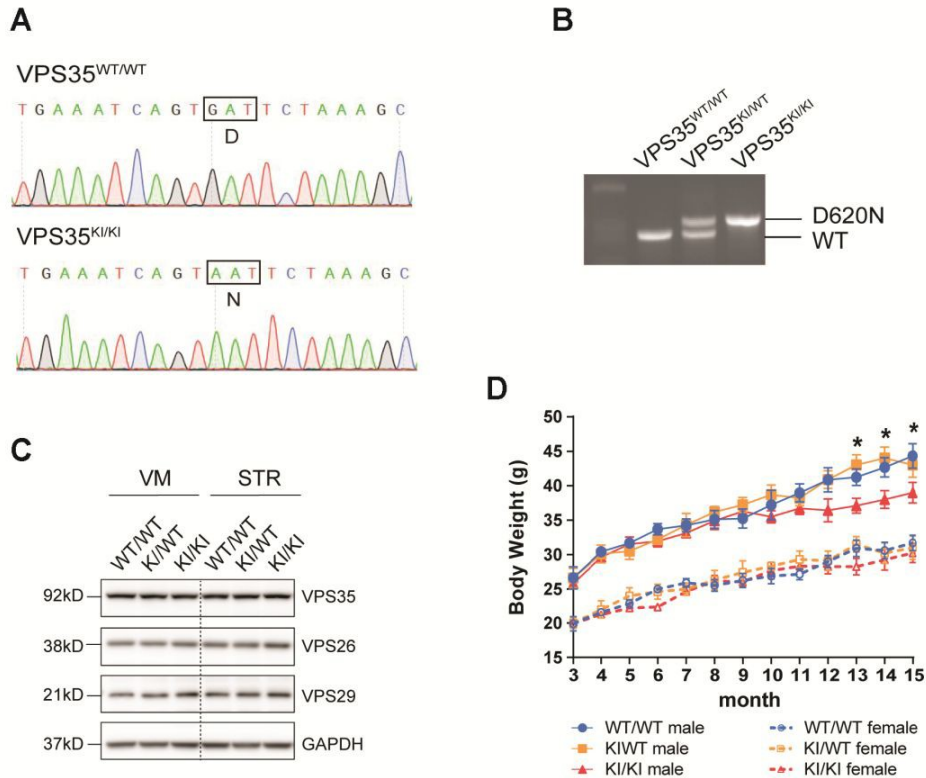

**Supplemental Figure 1. Generation of VPS35 D620N KI mice.** (A) Representative VPS35 genomic sequences showing the presence of the D620N mutation (GAT → AAT) in VPS35 D620N/D620N mice but not the VPS35 WT/WT mice. (B) Representative PCR genotyping of ear notch genomic DNA for VPS35 WT/WT, VPS35 D620N/WT and VPS35 D620N/D620N mice. (C) Representative Western blots of VPS35, VPS26 and VPS29 protein in ventral midbrain and striatum extracts from 14-month-old mice of three genotypes (n=7/genotype). GAPDH was blotted as an internal loading control. (D) Body weight of mice from three genotypes (one-way ANOVA with Tukey's post hoc test). Data are shown as mean ± SEM; \*P < 0.05.

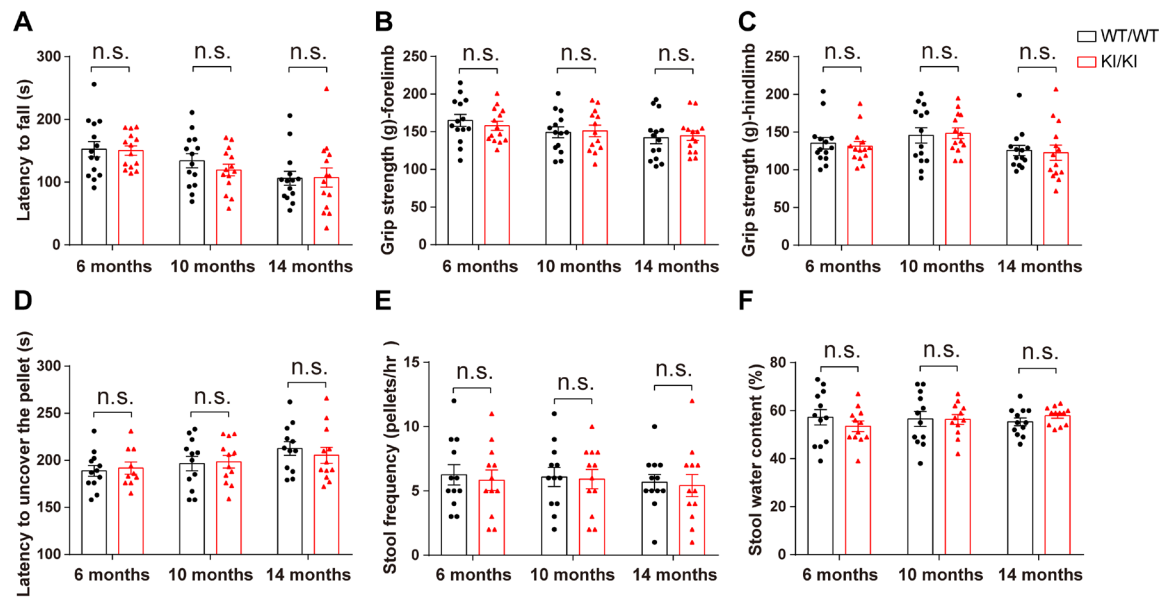

**Figure S2 Motor and non-motor function analysis of *VPS35*<sup>D620N/D620N</sup> mice and littermate WT controls (6, 10, 14 months).** (A) Latency to fall in rotarod test. (B) Forelimb grip strength. (C) Hindlimb grip strength. (D) Latency to uncover the pellet in buried pellet test. (E) Stool frequency in one-hour stool collection. (F) Stool water content in one-hour stool collection (n=13-14/group, two-way ANOVA with Tukey's post hoc test). Data are shown as mean ± SEM; n.s., not significant.

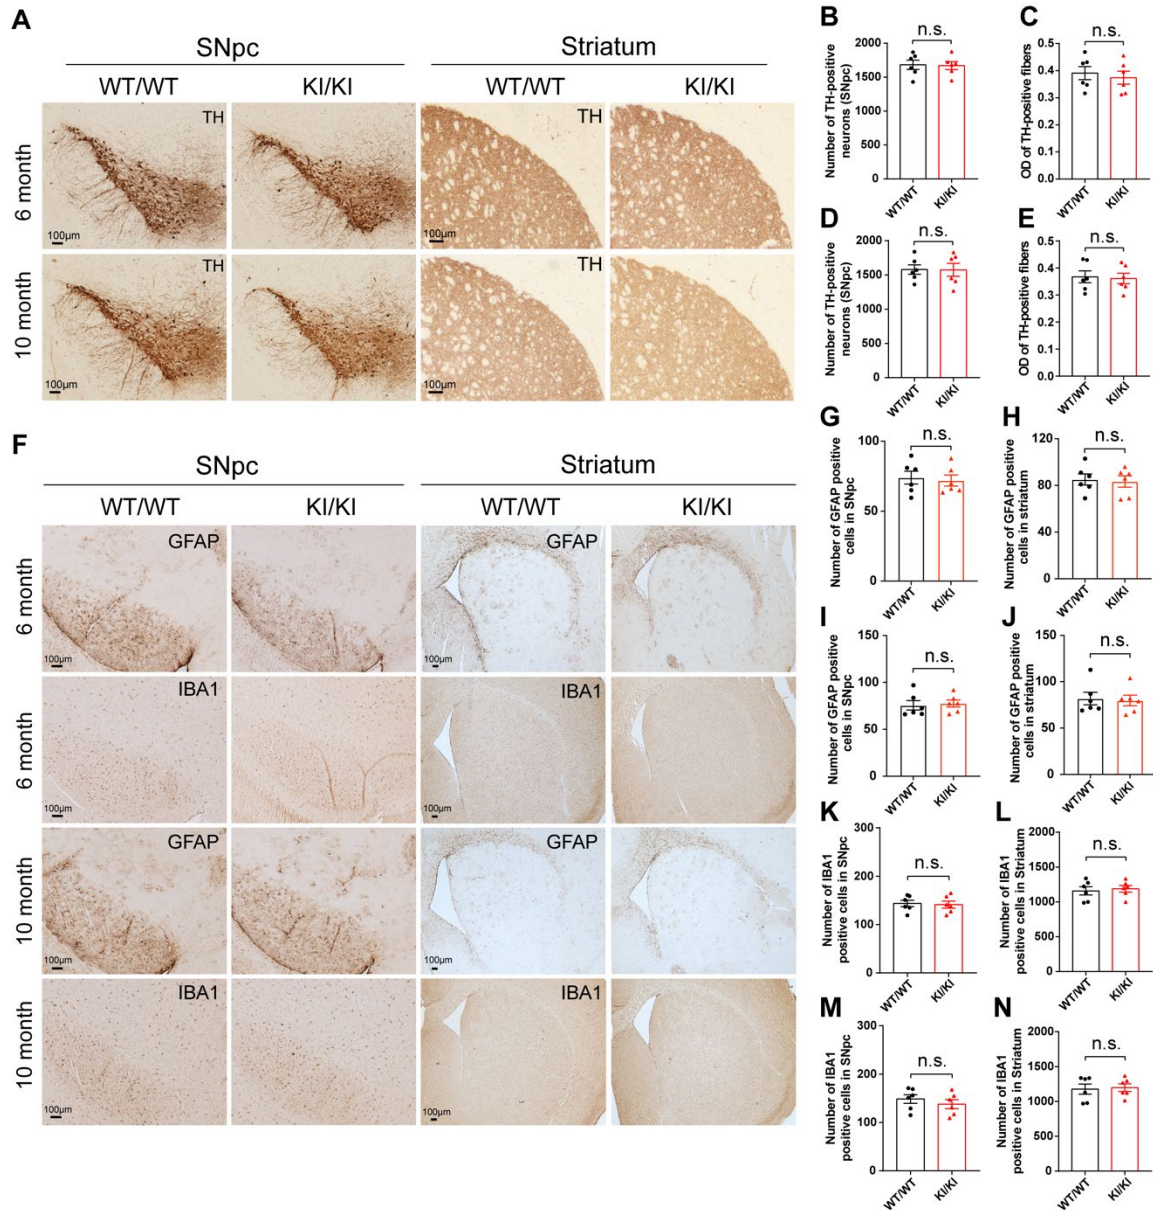

**Figure S3. Lack of neuropathological changes in 6 and 10 months old homozygous *VPS35 D620N* KI mice.** (A) Representative images of TH immunostaining in SNpc and striatum of *VPS35<sup>D620N/D620N</sup>* and WT mice at 6 or 10 months of age. Scale bar, 100  $\mu$ m. Quantification of TH-positive neurons in SNpc (B,D) and OD of TH-positive fibers in striatum (C,E) of *VPS35<sup>D620N/D620N</sup>* and WT mice at 6 months old (B,C, n=6), 10 months old (D,E, n=6). (F) Representative images of GFAP or IBA1 immunostaining in SNpc and striatum of *VPS35<sup>D620N/D620N</sup>* and WT mice at 6 or 10 months of age. Scale bar, 100  $\mu$ m. (G-N) Quantification of GFAP positive cells (G-J) and IBA1 positive cells (K-N) in SNpc (G,I,K,M) and striatum (H,J,L,N) of 6-month-old (G,H,K,L) or 10-month-old (I,J,M,N) *VPS35<sup>D620N/D620N</sup>* and WT controls (n=6/genotype). data are shown as mean  $\pm$  SEM; Student's t-test, unpaired, two tailed; n.s., not significant.

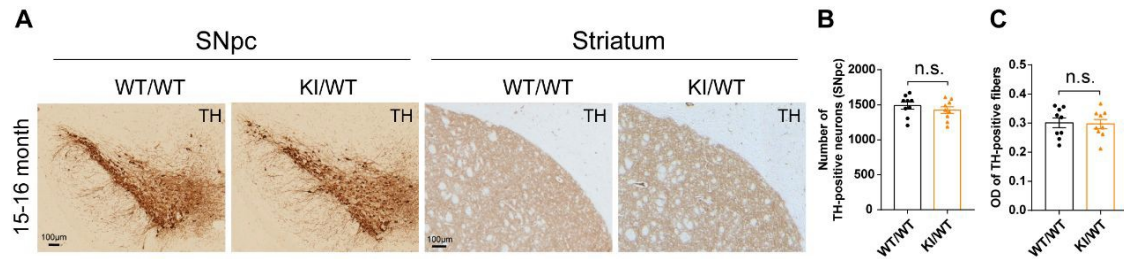

**Figure S4. Lack of neuropathological changes in 15-16 months old heterozygous *VPS35 D620N* KI mice.** (A) Representative images of TH immunostaining in SNpc and striatum of *VPS35<sup>D620N/WT</sup>* and WT mice at 15-16 months old. Scale bar, 100 µm. (B) Quantification of TH- positive neurons in SNpc and (C) OD of TH-positive fibers in striatum of *VPS35<sup>D620N/WT</sup>* and WT mice at 15-16 months old (n=6). data are shown as mean ± SEM; Student's t-test, unpaired, two tailed; n.s., not significant.

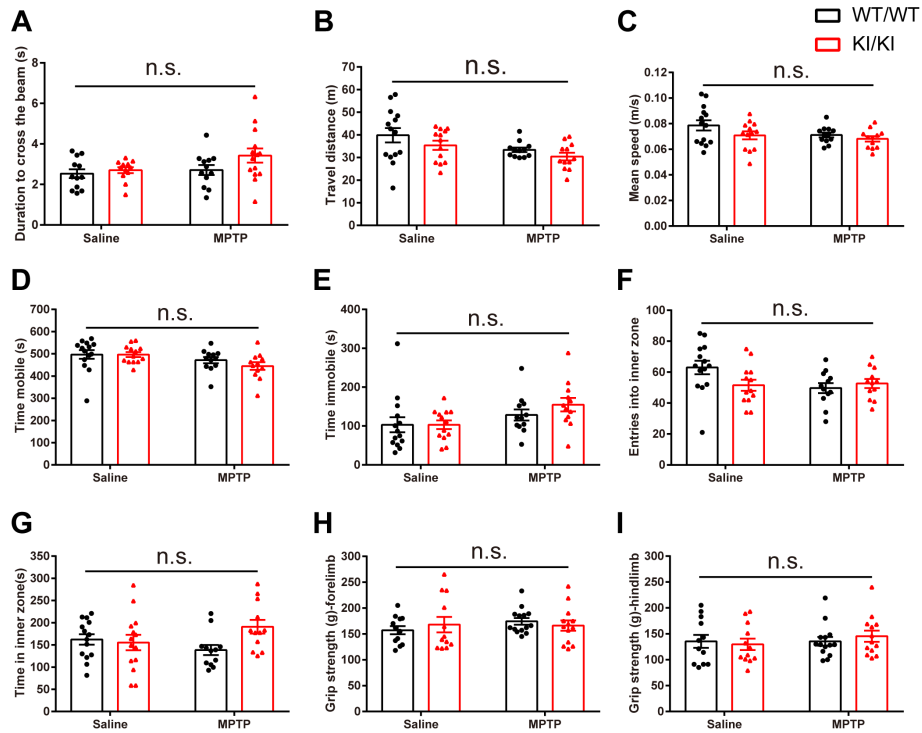

**Figure S5. Behavioral analysis of *VPS35<sup>D620N/D620N</sup>* mice and littermate WT controls with MPTP/Saline treatment.** (A) Duration to cross the wide beam (16mm) in beam walking test. (B-G) Travel distance, mean speed, Time mobile, time immobile, entries into inner zone and time in inner zone in open field test. (H) Forelimb grip strength. (I) Hindlimb grip strength. n=13-14/group; data are shown as mean  $\pm$  SEM; n.s., not significant; two-way ANOVA with Tukey's post hoc test.



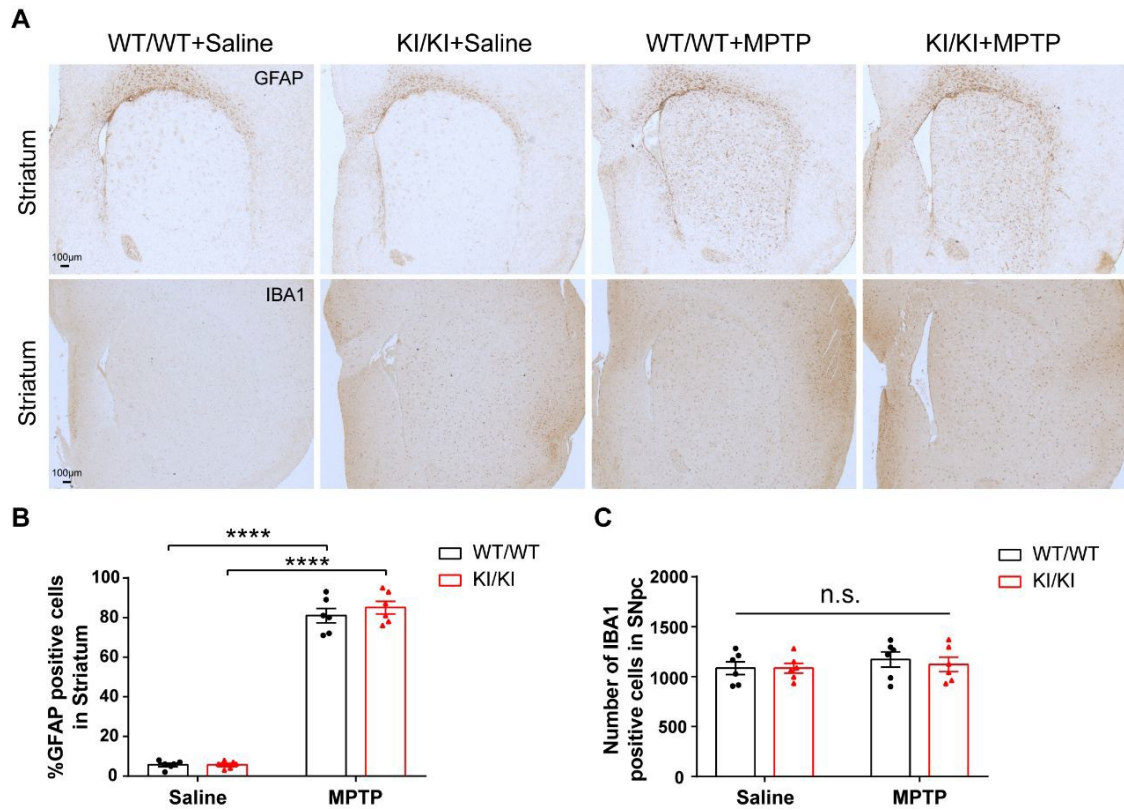

**Figure S6. Analysis of neuroinflammation in striatum from *VPS35<sup>D620N/D620N</sup>* mice and WT controls injected with MPTP/Saline.** (A) Representative images of GFAP and IBA1 immunostaining in striatum from *VPS35<sup>D620N/D620N</sup>* and WT mice injected with MPTP/Saline as indicated. Scale bar, 100  $\mu$ m. (B) Quantification of %GFAP positive cells in striatum. (C) Quantification of IBA1 positive cells in striatum.  $n=6$ ; mean  $\pm$  SEM; two-way ANOVA with Tukey's post hoc test; \* $P < 0.05$ , \*\* $P < 0.01$ , \*\*\* $P < 0.001$ , n.s., not significant.
